# Supplementary material for: Reconstructing the historical distribution of the Amur Leopard (Panthera pardus orientalis) in Northeast China based on historical records
Source: PubMed Central journal article supplement (PMC4926640; doi:10.3897/zookeys.592.6912), 2016-05-25
Supplement: zookeys-592-143-s001.pdf [file zookeys-592-143-s001.pdf]

### Appendix S1. Distribution information from new gazetteers records

| <i>Province</i> | <i>Title</i>                           | <i>Last record period</i> | <i>Records</i>                                                                                                                                                                                                                     |
|-----------------|----------------------------------------|---------------------------|------------------------------------------------------------------------------------------------------------------------------------------------------------------------------------------------------------------------------------|
| Heilongjiang    | Acheng Xianzhi                         | 1950s                     | Bao (Amur leopard)                                                                                                                                                                                                                 |
| Heilongjiang    | Bamiantong LinyejuZhi                  | 1960s                     | Bao (Amur leopard) was distributed in Fengyueqiao and Maqiaohe.<br>An Amur leopard was killed by truck in Fengyuanqiao in 1965                                                                                                     |
| Heilongjiang    | Dahailin LinyejuZhi                    | 1950s                     | Jinqian bao (Amur leopard)<br>An Amur leopard was captured in NO. 151 sawmill in 1953 by Chui Yunfeng.<br>An Amur leopard was killed in Lishugou in 1956<br>An Amur leopard was killed in Liushuhe Forestry Farm in 1964 in winter |
| Heilongjiang    | Dongning XianZhi                       | 1970s                     | Bao (Amur leopard)<br>A woman was killed by Amur leopard on the road from Xishan to Huluobowei in autumn in 1978                                                                                                                   |
| Heilongjiang    | HaiLin XianZhi                         | 1970s                     | Jinqian bao (Amur leopard)                                                                                                                                                                                                         |
| Heilongjiang    | Heilongjiang ShengZhi                  | 1980s                     | Jinqianbao (Amur leopard) was distributed in Qixinglizi Nature Reserve                                                                                                                                                             |
| Heilongjiang    | Linkou LinyejuZhi                      | 1970s                     | Jinqian bao (Amur leopard)                                                                                                                                                                                                         |
| Heilongjiang    | Longjiang Environmental Protection Zhi | 1960s                     | Bao (Amur leopard)                                                                                                                                                                                                                 |
| Heilongjiang    | Mudanjiang ShiZhi                      | 1970s                     | Bao (Amur leopard)                                                                                                                                                                                                                 |
| Heilongjiang    | Qitaihe Shi LinyeZhi                   | 1970s                     | Tubao (Amur leopard)                                                                                                                                                                                                               |
| Heilongjiang    | Shangzhi XianZhi                       | 1970s                     | Jinqian bao (Amur leopard) was distributed in the area from Zhanguangcailing mountain to DaTuDingZi mountain                                                                                                                       |
| Heilongjiang    | Shuangyashan ShiZhi                    | 1970s                     | Bao (Amur leopard)                                                                                                                                                                                                                 |
| Heilongjiang    | Suifenhe ShiZhi                        | 1980s                     | Jinqian bao (Amur leopard)                                                                                                                                                                                                         |
| Heilongjiang    | Suiyang LinyejuZhi                     | 1970s                     | Bao (Amur leopard)                                                                                                                                                                                                                 |
| Heilongjiang    | Tangyuan XianZhi                       | 1960s                     | Bao (Amur leopard)                                                                                                                                                                                                                 |
| Heilongjiang    | Wuchang LinyeZhi                       | 1970s                     | Bao (Amur leopard)                                                                                                                                                                                                                 |
| Heilongjiang    | Yanshou XianZhi                        | 1950s                     | Bao (Amur leopard)                                                                                                                                                                                                                 |
| Heilongjiang    | Yunshan Nongchangzhi                   | 1980s                     | Bao (Amur leopard)                                                                                                                                                                                                                 |
| Helongjiang     | Baoqing Xianzhi                        | 1970s                     | Jinqian bao (Amur leopard)                                                                                                                                                                                                         |
| Helongjiang     | Bawuer Nongchangzhi                    | 1950s                     | Jinqian bao (Amur leopard)<br>An witness in 1956                                                                                                                                                                                   |
| Helongjiang     | Bayan XianZhi                          | 1950s                     | Bao (Amur leopard) was disappeared since 1950s                                                                                                                                                                                     |
| Helongjiang     | Bin XianZhi                            | 1950s                     | Jinqian bao (Amur leopard)                                                                                                                                                                                                         |
| Helongjiang     | Dongfanghong LinyejuZhi                | 1980s                     | Bao (Amur leopard) was distributed in Qiyuan, Wulingdong, Yongxing, Shichang and Dayake                                                                                                                                            |
| Helongjiang     | Fangzheng XianZhi                      | 1970s                     | Jinqian bao (Amur leopard)                                                                                                                                                                                                         |
| Helongjiang     | Jidong XianZhi                         | 1970s                     | Baozi (Amur leopard)                                                                                                                                                                                                               |
| Helongjiang     | Linkou XianZhi                         | 1970s                     | Jinqian bao (Amur leopard)                                                                                                                                                                                                         |

|             |                                   |       |                                                                                                          |
|-------------|-----------------------------------|-------|----------------------------------------------------------------------------------------------------------|
| Helongjiang | Mishan XianZhi                    | 1970s | Bao (Amur leopard)                                                                                       |
| Helongjiang | Mudangjiang Guanlijuzhi           | 1980s | Bao (Amur leopard) was distributed in Mudangjiangshi, Mishanxian, Hailinxian, Ninganxian and Jidongxian  |
| Helongjiang | Mudanjiang Difanglinyezhi         | 2005  | Jinqian Bao (Amur leopard)<br>An witness in Xiaobeihu Forestry Farm in Ningan in 2005                    |
| Helongjiang | Mudanjiangshi Huanjingbaohuzhi    | 1980s | Dongbei Bao (Amur leopard)<br>47 individual in Mudanjiangshi from local research in 1980                 |
| Helongjiang | Ningan XianZhi                    | 1970s | Bao (Amur leopard)                                                                                       |
| Helongjiang | Raohe XianZhi                     | 1980s | Jinqian bao (Amur leopard)                                                                               |
| Helongjiang | Songhuajiang DiquZhi              | 1970s | Jinqian bao (Amur leopard) was distributed in Heilonggong in Shangzhi and Yuejin Forestry Farm in Yabuli |
| Helongjiang | Suiling XianZhi                   | 1970s | Bao (Amur leopard)                                                                                       |
| Helongjiang | Tonghe XianZhi                    | 1960s | Bao (Amur leopard)                                                                                       |
| Helongjiang | Weihe LinyejuZhi                  | 1970s | Bao (Amur leopard)                                                                                       |
| Helongjiang | Yichun Shizhi                     | 1980s | Bao (Amur leopard) was distributed in southern Yichun                                                    |
| Jilin       | Antu Xianzhi                      | 1980s | Bao (Amur leopard) distributed in Southern Huanggouling                                                  |
| Jilin       | Bajiazi LinyejuZhi                | 1980s | Jinqian bao (Amur leopard)                                                                               |
| Jilin       | Dunhuaxian Wildlife JianZhi       | 1980s | Jinqian bao (Amur leopard) distributed in Dapuchai, Linsheng and Dashitou                                |
| Jilin       | Fusong XianZhi                    | 1970s | Jinqian bao (Amur leopard)                                                                               |
| Jilin       | Helong LinyejuZhi                 | 1990s | Tubaozi (Amur leopard)                                                                                   |
| Jilin       | Helong ShiZhi                     | 1990s | Jinqian bao (Amur leopard)                                                                               |
| Jilin       | Helong Xian LinyeZhi              | 1980s | Jinqian bao (Amur leopard)                                                                               |
| Jilin       | Hongshili ZhenZhi                 | 1980s | Bao (Amur leopard)                                                                                       |
| Jilin       | Huadian XianLinyeZhi              | 1980s | Bao (Amur leopard)                                                                                       |
| Jilin       | Huinan Forestry Management Ju Zhi | 1980s | Jinqian bao (Amur leopard)                                                                               |
| Jilin       | Hunchun ShiZhi                    | 1990s | Jinqian bao (Amur leopard)                                                                               |
| Jilin       | Hunjiang XianZhi                  | 1980s | Jinqian bao (Amur leopard)                                                                               |
| Jilin       | Jian XianZhi                      | 1980s | Bao (Amur leopard)                                                                                       |
| Jilin       | Jiaohe XianZhi                    | 1960s | Jinqian bao (Amur leopard)                                                                               |
| Jilin       | Jingyu XianZhi                    | 1970s | Bao (Amur leopard)                                                                                       |
| Jilin       | Linjiang LinyejuZhi               | 1990s | Jinqian bao (Amur leopard)                                                                               |
| Jilin       | Longjing XianZhi                  | 1980s | Tubaozi (Amur leopard)                                                                                   |
| Jilin       | Quanyang LinyejuZhi               | 1980s | Jinqian bao (Amur leopard)                                                                               |
| Jilin       | Taishang ZhenZhi                  | 1980s | Bao (Amur leopard)                                                                                       |
| Jilin       | Tianqiaoling LinyejuZhi           | 1980s | Jinqian bao (Amur leopard)                                                                               |
| Jilin       | Tonghua ShiZhi                    | 1980s | Jinqian bao (Amur leopard)                                                                               |
| Jilin       | Tonghua XianZhi                   | 1980s | Bao (Amur leopard)                                                                                       |

|       |                      |       |                      |
|-------|----------------------|-------|----------------------|
| Jilin | Wulajie XiangzhenZhi | 1980s | Tubao (Amur leopard) |
| Jilin | Yanji ShiZhi         | 1980s | Bao (Amur leopard)   |
| Jilin | YongZhi ShiZhi       | 1970s | Bao (Amur leopard)   |
| Jilin | YongZhi XianZhi      | 1970s | Bao (Amur leopard)   |

## Appendix S2. Important distribution information from other resources

| <i>Resource</i>                                                 | <i>Type</i>           | <i>Year</i>   | <i>Location</i>                                                                                                                                                                                                                                                                         |
|-----------------------------------------------------------------|-----------------------|---------------|-----------------------------------------------------------------------------------------------------------------------------------------------------------------------------------------------------------------------------------------------------------------------------------------|
| Article                                                         | Footprint             | 2004          | Madida Reserve station of Hunchun Nature Reserve                                                                                                                                                                                                                                        |
| Article                                                         | Footprint and witness | 2004          | Qinglongtai Reserve station of Hunchun Nature Reserve                                                                                                                                                                                                                                   |
| Article                                                         | Infrared camera       | 2004          | Hunchun Nature Reserve                                                                                                                                                                                                                                                                  |
| Article                                                         | Interview             | 1970          | Two Amur leopard were shoot in Erdao Town                                                                                                                                                                                                                                               |
| Fauna (Beast investigation report in Northeast)                 | specimen              | 1950s         | Baoqing (Heilongjiang Province), Wangqing, Antu(Jilin Province)                                                                                                                                                                                                                         |
| Fauna (China Fauna:Beast Volume)                                | specimen              | 1980s         | Amur leopard was distributed in Baoqing, Mudanjiang, Dongning, Muling (Heilongjiang); Wangqing, Hunchun, Helong, Dunhua, Yanji, Antu, Changbai, Jian, Fusong, Tonghua, Jingyu, Hunjiang, Liuhe, Huinan, Jiaohe, Shulan, Huadian (Jilin); Keyouqianqi (Inner Mongolia Autonomous Region) |
| Fauna (Wild animal of the southwest slope of Changbai Mountain) | specimen              | 1980s         | Bao (Amur leopard) distributed in Shiyidaogou, Shisandaogou, Malugou, Baoquanshan, Fusong manjiang in Changbai and Dongbeicha in Hunjiang                                                                                                                                               |
| Hunchun Nature Reserve                                          | specimen              | 1980s         | Amur leopard was killed in Yangpao Xiang                                                                                                                                                                                                                                                |
| Scientific investigation                                        | investigation         | 1992          | 2 indiv. in Madida, Qiuligou and Chunhua, another 1-2 indiv. in Duhuangzi and Xinancha                                                                                                                                                                                                  |
| Scientific investigation in Jilin in 1998                       | Footprints            | 1997          | Footprints in Huangbaishugou                                                                                                                                                                                                                                                            |
|                                                                 | Food debris           | 1996          | Food debris in Xibeichagou                                                                                                                                                                                                                                                              |
|                                                                 | Witness               | 1995 and 1998 | Two Amur leopard were tracking the deers in Yingzuilazi.                                                                                                                                                                                                                                |
|                                                                 |                       |               | Another witness is in Guancailazi in 1995                                                                                                                                                                                                                                               |
|                                                                 |                       | 1996-1997     | Witness in Caomaocun in Chunhua                                                                                                                                                                                                                                                         |
|                                                                 |                       | 1997-1998     | Witness in Qingniwa Donggou and                                                                                                                                                                                                                                                         |

|                                                  |                               |               |                                                                      |
|--------------------------------------------------|-------------------------------|---------------|----------------------------------------------------------------------|
|                                                  |                               |               | Tianjiazhai                                                          |
|                                                  |                               | 1997          | Witness in Guchengshan, Lanjiatangzicun in Chunhua                   |
|                                                  |                               | 1996          | Witness in Dahuanggou Forestry Farm and Sandaogou Forestry Farm      |
|                                                  |                               | 1998          | Witness in Yushuxiang                                                |
|                                                  |                               | 1998          | Footprints in Qingniwa Donggou                                       |
| Scientific investigation in Heilongjiang in 1998 | Witness                       | 1996 and 1998 | Witness in Shuangqiaozi Forestry Farm                                |
|                                                  |                               | 1997-1998     | Witness in Laoheishan Forestry Farm                                  |
|                                                  |                               | 1997-1998     | Witness in Gonghe Forestry Farm                                      |
| News                                             | Infrared camera and footprint | 2011          | Amur leopard was record in Xinancha Forestry Farm                    |
| News                                             | attack                        | 1999          | Two man were attacked in Naozhigou in Hadamen Xiang                  |
| News                                             | Food debris                   | 2014          | Badao town of Shulan city,Jilin Province                             |
| News                                             | Food debris                   | 2013          | Jinsong Forestry of Baihe Forestry Bureau                            |
| News                                             | Footprint                     | 2011          | Duhuangzi Forestry and Xinancha Forestry of Wangqing Forestry Bureau |
| News                                             | Footprint and food debris     | 2014          | Zhengyang town of Shulan city,Jilin Province                         |
| News                                             | Footprints                    | 2012          | Dongqing Forestry of Antu Forestry Bureau                            |
| News                                             | Infrared camera and footprint | 2014          | Chaoyanggou Forestry                                                 |
| News                                             | Photos and videos             | 2015          | Mengling town of Hunchun city,Jilin Province                         |
| News                                             | Video Record                  | 2011          | Jingxin town of Hunchun city, Jilin Province                         |
| News                                             | Video Record                  | 2014          | Wujia mountain in Jingxin town, Jilin Province                       |

---
