# Supplementary material for: Reconstructing the historical distribution of the Amur Leopard (Panthera pardus orientalis) in Northeast China based on historical records
Source: PubMed Central journal article supplement (PMC4926640; doi:10.3897/zookeys.592.6912), 2016-05-25
Supplement: zookeys-592-143-s002.pdf [file zookeys-592-143-s002.pdf]

**Table S1. Records in different periods**

| <i>Resource</i>                   | <i>1950s</i> | <i>1960s</i> | <i>1970s</i> | <i>1980s</i> | <i>1990s</i> | <i>2000-2014</i> |
|-----------------------------------|--------------|--------------|--------------|--------------|--------------|------------------|
| Fauna                             | 114          | 114          | 101          | 74           |              |                  |
| Papers                            | 8            | 8            | 4            |              |              |                  |
| Nature reserve scientific surveys |              |              |              | 2            | 1            | 2                |
| New gazetteers                    | 294          | 269          | 232          | 124          | 17           |                  |
| Kill records                      | 2*           | 2*           | 2            | 1            |              |                  |
| Attack human records              |              |              | 1*           |              | 1            |                  |
| Prey remains and claw traces      |              |              |              |              | 3            | 4                |
| Excreta                           |              |              |              |              | 1            |                  |
| Footprints                        |              |              |              |              | 7            | 7                |
| Photographs                       |              |              |              |              |              | 6                |
| Witness                           | 2*           |              |              |              | 10           | 2(1*)            |
| Exclude records (repeat records)  | 111          | 115          | 98           | 69           | 1            | 4                |
| Total                             | 305          | 278          | 242          | 132          | 38           | 17               |

*“\*” means that such records came from new gazetteers; one witness record in the 2000s came from new gazetteers*
